# Supplementary material
Source: publisher figshare collection journal article supplement (https://diabetesjournals.figshare.com/ndownloader/files/31621232)
Supplement: Supplementary file 1 [file 31621232]

**Supplementary Appendix S1. Semi-Structured Interview Guide**

*Introduction Questions*

1. When were you diagnosed with diabetes?
2. How did you find out you had diabetes?
3. Do you have a doctor you see regularly?
   1. If yes: How often do you see this person? When did you first start seeing this doctor?
   2. If no: When is the last time you saw a doctor?

*General Relationship with Doctor*

“Now I am going to ask you some general questions about your relationship with your doctor. [If no regular doctor, think of the doctor you saw most recently].”

1. What is important to you in your relationship with your doctor?
   1. PROBE: Can you remember a conversation you had with your doctor where you felt like you could be comfortable and honest with him/her?
2. How comfortable do you feel talking to your doctor about your diabetes/your diabetes management?
   1. PROBE: What makes you feel this way? What could be different to make you more comfortable?
3. How concerned are you about how your doctor thinks of you?
   1. PROBE: Do you feel like you need to keep up an image for your doctor?
   2. PROBE: Have you ever felt as though your doctor did not like, respect, or have confidence in you? Tell me about that.

*Health Experiences and Conditions*

“Research shows that patients often feel anxious and worried about their health problems.”

1. What things worry you surrounding your health? Do you talk to your doctor about this?
2. What do you think caused your diabetes?
3. How often do you think about the way diabetes impacts your daily life?
   1. PROBE: How you are perceived by others? How it impacts your family/kids? Which of these things concerns you most?

*Motivation to Change Behavior*

“From what I understand, type 2 diabetes requires lots of lifestyle changes in order to be managed.”

1. What lifestyle changes or behaviors does your doctor tell you to follow in order to manage your diabetes?
   1. What are your treatment goals?
2. Do you find it difficult to meet your treatment goals?
3. What makes it hard to follow these behaviors?
4. What motivates you to follow these behaviors?
5. What lifestyle changes or behaviors do you think you should follow that you don’t follow right now?
6. How do you feel when you are not meeting your treatment goals?
7. When your doctor tells you to change your lifestyle/behaviors how does that make you feel?
   1. PROBE: What role does guilt play in your diabetes management? Is guilt helpful for you to manage your diabetes? Can you think of an experience where guilt was unhelpful for your diabetes management?

*Consequences*

1. Do you ever feel tempted to avoid talking to your doctor about your health conditions/behaviors? Can you tell me more about that?
2. If your doctor knew everything about your diabetes management, how would that change things? Would your relationship with him/her change?

“Research shows that it is common for patients to experience shame when talking with their doctors and that it can be difficult for patients to be open and honest. Some patients suggest that this is because they must talk about personal things with a doctor and because doctors may have prejudice against diabetics. Have you ever had an experience when a physician said something to you that made you experience shame?”

*Demographic Questions*

- Name
- Race
- Gender
- Employment status
- Age
- Highest year of education completed

“Thank you for taking the time to talk to me about your experiences in your relationship with your doctor. Your perspective is very valuable to me as I conduct my research and will hopefully help improve doctor-patient interactions. Before we get off the phone, is there anything else you would like to tell me or anything else you think I should know? Do you have any questions?”
